# Supplementary material for: Dose- and Volume-Limiting Late Toxicity of FLASH Radiotherapy in Cats with Squamous Cell Carcinoma of the Nasal Planum and in Mini Pigs
Source: PubMed Central journal article supplement — Clin Cancer Res. 2022 Apr 14;28(17):3814–23. doi: 10.1158/1078-0432.CCR-22-0262 (PMC9433962; doi:10.1158/1078-0432.ccr-22-0262), 2022-04-14

**Figure S1:** Upper row: Pictures show the clinical situation of the cat (*CatNr 6*) 15 months post-FLASH treatment. The cat presented with no external sign of complication (left panel) but showed maxilla and mucosal necrosis (middle panel). Right panel shows the extension of the necrosis on sagittal CT-scan sections.

Lower row: Pictures show the clinical situation of the cat (*CatNr 15*) 9- and 12-months post-FLASH treatment. At 9 months post treatment the cat presented with soft tissue necrosis of the lip (left panel). At 12 months, the skin defect was accompanied by mucosal/ gingival as well as maxillary necrosis (middle and right panel).

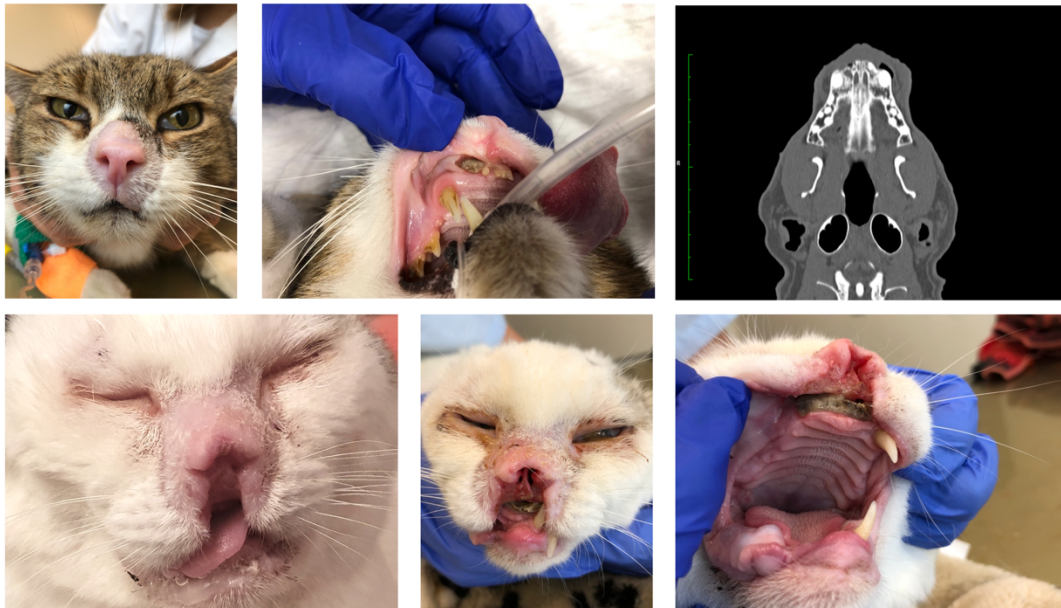

Supplement: ccr-22-0262_figure_s1_supps1.pdf [file ccr-22-0262_figure_s1_supps1.pdf]
