# Supplementary material for: Dose- and Volume-Limiting Late Toxicity of FLASH Radiotherapy in Cats with Squamous Cell Carcinoma of the Nasal Planum and in Mini Pigs
Source: PubMed Central journal article supplement — Clin Cancer Res. 2022 Apr 14;28(17):3814–23. doi: 10.1158/1078-0432.CCR-22-0262 (PMC9433962; doi:10.1158/1078-0432.ccr-22-0262), 2022-04-14

**Figure S2:** Percentage depth dose (PDD) (a) and lateral profiles at depths of 0 mm (b), 10 mm (c), 20 mm (d) as measured and as predicted by the eRT6 beam model in water. Measured and simulated ranges and 90% (R90%), 80% (R80%), and 50% (R50%) of the maximum dose are indicated in (a) for the PDD. Measured and simulated full-width at half-maximum (FWHM), full-width at 80% of the maximum (FW80%), and 80%-20% penumbra (P80-20%) of the lateral profiles are indicated in (b), (c), and (d).

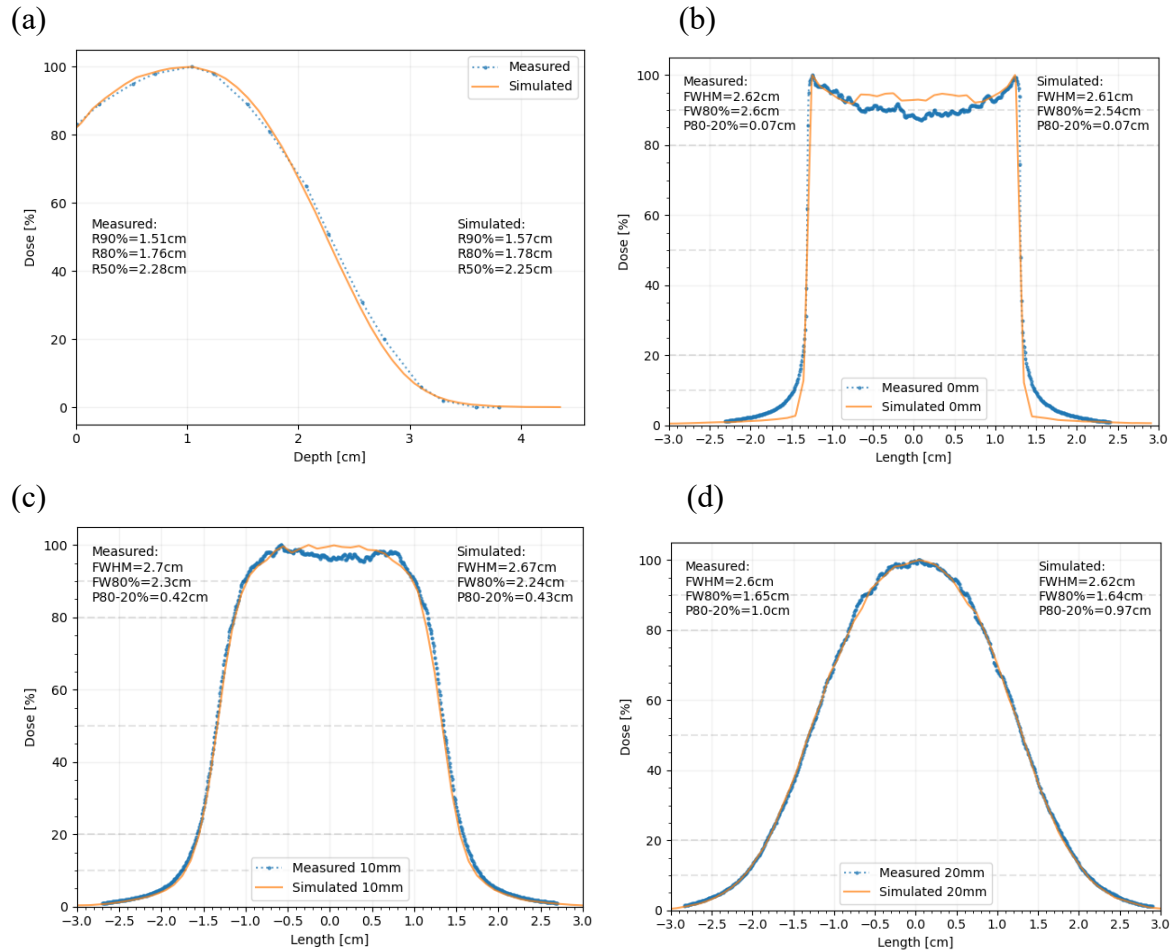

Supplement: ccr-22-0262_figure_s2_supps2.pdf [file ccr-22-0262_figure_s2_supps2.pdf]
