# Supplementary material for: Dose- and Volume-Limiting Late Toxicity of FLASH Radiotherapy in Cats with Squamous Cell Carcinoma of the Nasal Planum and in Mini Pigs
Source: PubMed Central journal article supplement — Clin Cancer Res. 2022 Apr 14;28(17):3814–23. doi: 10.1158/1078-0432.CCR-22-0262 (PMC9433962; doi:10.1158/1078-0432.ccr-22-0262), 2022-04-14

**Figure S3:** Upper row: Representative coronal (a) and sagittal (b) CT slices overlaid with reconstructed dose distribution of Arm 1 cat patient (*CatNr 2*) for illustration purposes. The 5 mm bolus is indicated by a rose contour.

Lower row: Representative coronal (c) and sagittal (d) CT slices overlaid with reconstructed dose distribution of Arm 2 cat patient (*CatNr 6*) for illustration purposes. Location of osteonecrosis is indicated by light green contour in sagittal view (b).

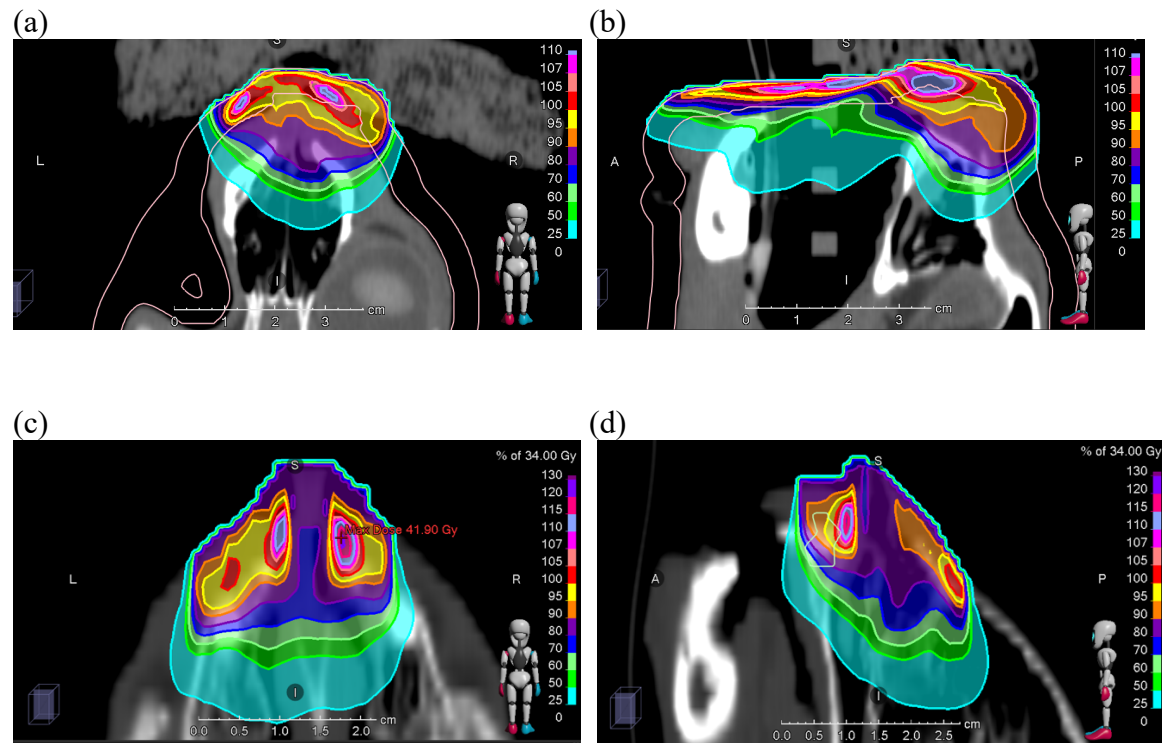

Supplement: ccr-22-0262_figure_s3_supps3.pdf [file ccr-22-0262_figure_s3_supps3.pdf]
