# Supplementary material for: Dose- and Volume-Limiting Late Toxicity of FLASH Radiotherapy in Cats with Squamous Cell Carcinoma of the Nasal Planum and in Mini Pigs
Source: PubMed Central journal article supplement — Clin Cancer Res. 2022 Apr 14;28(17):3814–23. doi: 10.1158/1078-0432.CCR-22-0262 (PMC9433962; doi:10.1158/1078-0432.ccr-22-0262), 2022-04-14
Supplement: ccr-22-0262_table_s1_suppts1.pdf [file ccr-22-0262_table_s1_suppts1.pdf]

**Table S1a: Radiation side effects and overall performance status (VROG morbidity scoring scheme) (14)**

|                                  | Grade 0                                                                                                              | Grade 1                                                                                                                                                                                                      | Grade 2                                                                                                                                             | Grade 3                                                                                   |
|----------------------------------|----------------------------------------------------------------------------------------------------------------------|--------------------------------------------------------------------------------------------------------------------------------------------------------------------------------------------------------------|-----------------------------------------------------------------------------------------------------------------------------------------------------|-------------------------------------------------------------------------------------------|
| <b>Acute radiation toxicity</b>  |                                                                                                                      |                                                                                                                                                                                                              |                                                                                                                                                     |                                                                                           |
| <i>Skin</i>                      | no change over baseline                                                                                              | erythema, dry desquamation, alopecia / epilation                                                                                                                                                             | patchy moist desquamation without edema                                                                                                             | confluent moist desquamation with edema and/or ulceration, hemorrhage, necrosis           |
| <i>Mucous membrane</i>           | no change over baseline                                                                                              | Injection without mucositis                                                                                                                                                                                  | patchy mucositis with patient seemingly pain-free                                                                                                   | confluent fibrinous mucositis necessitating analgesia, ulceration, hemorrhage or necrosis |
| <b>Late radiation toxicity</b>   |                                                                                                                      |                                                                                                                                                                                                              |                                                                                                                                                     |                                                                                           |
| <i>Skin</i>                      | None                                                                                                                 | alopecia, hyperpigmentation, leukotrichia                                                                                                                                                                    | asymptomatic induration (fibrosis)                                                                                                                  | severe induration causing physical impairment, necrosis                                   |
| <i>Mucous membrane</i>           | None                                                                                                                 | slight atrophy and telangiectasia                                                                                                                                                                            | marked atrophy with complete dryness, self-limited ulceration                                                                                       | ulceration, necrosis                                                                      |
| <i>Bone</i>                      | None                                                                                                                 | pain on palpation                                                                                                                                                                                            | radiographic changes                                                                                                                                | necrosis / spontaneous fracture                                                           |
| <b>Performance status (VCOG)</b> |                                                                                                                      |                                                                                                                                                                                                              |                                                                                                                                                     |                                                                                           |
| <i>Performance status</i>        | Mild lethargy over baseline or diminished activity from pre-disease level, but able to function as an acceptable pet | Moderate lethargy causing some difficulty with performing activities of daily living (ADL) or ambulatory only to the point of eating, sleeping and consistently defecating and urinating in acceptable areas | Compromised, severely restricted in ADL or unable to confine urinations and defecation to acceptable areas or will consume food if offered in place | Disabled, must be force fed and helped to perform ADL                                     |

**Table S1b: Toxicity Scoring (19)**

| <b>Acute / subacute toxicity</b><br>[<3months after end of RT] |                                        | <b>Late toxicity</b><br>[>3months after end of RT] |                  |
|----------------------------------------------------------------|----------------------------------------|----------------------------------------------------|------------------|
| A0                                                             | Depilation                             | L0                                                 | Depilation       |
| A1                                                             | Erythema                               | L1                                                 | Atrophy          |
| A2                                                             | Pigmentation                           | L2                                                 | Flaky appearance |
| A3                                                             | Dry desquamation                       | L3                                                 | Pigmentation     |
| A4                                                             | Moist desquamation that heals          | L4                                                 | Fibrosis         |
| A5                                                             | Most desquamation that partially heals | L5                                                 | Teleangiectasia  |
| A6                                                             | Most desquamation that doesn't heal    | L6                                                 | Necrosis         |
