# Supplementary material for: Dose- and Volume-Limiting Late Toxicity of FLASH Radiotherapy in Cats with Squamous Cell Carcinoma of the Nasal Planum and in Mini Pigs
Source: PubMed Central journal article supplement — Clin Cancer Res. 2022 Apr 14;28(17):3814–23. doi: 10.1158/1078-0432.CCR-22-0262 (PMC9433962; doi:10.1158/1078-0432.ccr-22-0262), 2022-04-14
Supplement: ccr-22-0262_table_s2_suppts2.pdf [file ccr-22-0262_table_s2_suppts2.pdf]

**Table S2a: Beam parameters used for the treatment of the cats included in the SoC arm**

| Name | Field Size [cm] | Bolus [cm] | Prescription Dose [Gy] | Number of Fraction | Total Dose [Gy] | Energie Electron [MeV] | Date first RT | Date last RT |
|------|-----------------|------------|------------------------|--------------------|-----------------|------------------------|---------------|--------------|
| 1    | 4 x 4           | 0.5        | 4.8                    | 10                 | 48              | 6                      | 14.01.2019    | 18.01.2019   |
| 2    | 4 x 4           | 0.5        | 4.8                    | 10                 | 48              | 6                      | 21.01.2019    | 25.01.2019   |
| 3    | 6 x 6           | 0.5        | 4.8                    | 10                 | 48              | 6                      | 01.04.2019    | 05.04.2019   |
| 4    | 6 x 6           | 1          | 4.8                    | 10                 | 48              | 9                      | 07.06.2019    | 14.06.2019   |
| 7    | 4 x 4           | 0.5        | 4.8                    | 10                 | 48              | 6                      | 16.09.2019    | 20.09.2019   |
| 9    | 4 x 4           | 0.5        | 4.8                    | 10                 | 48              | 6                      | 25.11.2019    | 29.11.2019   |
| 10   | 4 x 4           | 1          | 4.8                    | 10                 | 48              | 12                     | 09.12.2019    | 13.12.2019   |
| 13   | 4 x 4           | 0.5        | 4.8                    | 10                 | 48              | 6                      | 04.05.2020    | 08.05.2020   |
| 16   | 4 x 4           | 0.5        | 4.8                    | 10                 | 48              | 6                      | 26.10.2020    | 30.10.2020   |

**Table S2b: Beam parameters used for the treatment of the cats included in the FLASH arm**

| Date       | Name | Treatment Area diameter [cm] | Bolus [y/n] | Prescription Dose at the surface [Gy] | Delivered Dose Mesured at the surface [Gy] | Mean Dose Rate [Gy/s] | Instantaneous Dose Rate [Gy/s] | Grid Tension [V] | Number of Pulses | Frequency [Hz] | Pulse Width [ $\mu$ s] | SSD [cm] | Treatment Time [ms] |
|------------|------|------------------------------|-------------|---------------------------------------|--------------------------------------------|-----------------------|--------------------------------|------------------|------------------|----------------|------------------------|----------|---------------------|
| 06.06.2019 | 5    | 2.6                          | n           | 30                                    | 30.26                                      | 1513                  | 5.60E+06                       | 213              | 3                | 100            | 1.8                    | 31.8     | 20                  |
| 26.08.2019 | 6    | 2.6                          | n           | 30                                    | 29.99                                      | 1500                  | 5.55E+06                       | 215              | 3                | 100            | 1.8                    | 31.8     | 20                  |
| 17.09.2019 | 8    | 2.6                          | n           | 30                                    | 29.71                                      | 1486                  | 5.50E+06                       | 216              | 3                | 100            | 1.8                    | 31.8     | 20                  |
| 29.01.2020 | 11   | 2.6                          | n           | 30                                    | 30.27                                      | 1514                  | 5.61E+06                       | 214              | 3                | 100            | 1.8                    | 31.8     | 20                  |
| 10.02.2020 | 12   | 2.6                          | n           | 30                                    | 32.16                                      | 1608                  | 5.96E+06                       | 218              | 3                | 100            | 1.8                    | 31.8     | 20                  |
| 08.06.2020 | 14   | 2.6                          | n           | 30                                    | 31.55                                      | 1578                  | 5.84E+06                       | 215              | 3                | 100            | 1.8                    | 31.8     | 20                  |
| 13.07.2020 | 15   | 2.6                          | n           | 30                                    | 29.72                                      | 1486                  | 5.50E+06                       | 213              | 3                | 100            | 1.8                    | 31.8     | 20                  |

**Table S2c: Beam parameters used for FLASH irradiation on the skin of pigs**

| Field Size [cm] | Volume [mm <sup>3</sup> ] | Prescribed Dose [Gy] | Mean Dose Rate [Gy/s] | Instantaneous Dose Rate [Gy/s] | Grid Tension [V] | Number of Pulses | Frequency [Hz] | Pulse Width [ $\mu$ s] | SSD [cm] | Treatment Time [ms] |
|-----------------|---------------------------|----------------------|-----------------------|--------------------------------|------------------|------------------|----------------|------------------------|----------|---------------------|
| 3.5 X 4.5       | 24                        | 31                   | 163                   | 8.61E+05                       | 300              | 20               | 100            | 1.8                    | 78.5     | 190                 |
| 8 X 8           | 100                       |                      | 163                   | 8.61E+05                       | 300              | 20               | 100            | 1.8                    | 78.2     | 190                 |
