# Supplementary material for: Dose- and Volume-Limiting Late Toxicity of FLASH Radiotherapy in Cats with Squamous Cell Carcinoma of the Nasal Planum and in Mini Pigs
Source: PubMed Central journal article supplement — Clin Cancer Res. 2022 Apr 14;28(17):3814–23. doi: 10.1158/1078-0432.CCR-22-0262 (PMC9433962; doi:10.1158/1078-0432.ccr-22-0262), 2022-04-14
Supplement: ccr-22-0262_table_s3_suppts3.pdf [file ccr-22-0262_table_s3_suppts3.pdf]

**Table S3a: BED, SFED and EQD2 reported for the SoC = 10x4.8 Gy**

| <b>10 x 4.8 Gy</b> |     |                 |                  |                             |
|--------------------|-----|-----------------|------------------|-----------------------------|
| Dose per frac =    | 4.8 | Total dose =    | 48               |                             |
|                    |     | <b>BED [Gy]</b> | <b>SFED [Gy]</b> | <b>EQD<sub>2</sub> [Gy]</b> |
| $\alpha/\beta =$   | 3   | 124.8           | 17.9             | 74.9                        |
| $\alpha/\beta =$   | 10  | 71.0            | 22.1             | 59.2                        |

**Table S3b: BED, SFED and EQD2 reported for the prescribed FLASH treatment = 30 Gy**

| <b>30 Gy</b>     |    |                 |                  |                             |
|------------------|----|-----------------|------------------|-----------------------------|
| Dose per frac =  | 30 | Total dose =    | 30               |                             |
|                  |    | <b>BED [Gy]</b> | <b>SFED [Gy]</b> | <b>EQD<sub>2</sub> [Gy]</b> |
| $\alpha/\beta =$ | 3  | 330.0           | 30.0             | 198.0                       |
| $\alpha/\beta =$ | 10 | 120.0           | 30.0             | 100.0                       |

**Table S3c: BED, SFED and EQD2 reported assuming a DMF of approx. 30% = 20 Gy**

| <b>20 Gy</b>     |    |                 |                  |                             |
|------------------|----|-----------------|------------------|-----------------------------|
| Dose per frac =  | 20 | Total dose =    | 20               |                             |
|                  |    | <b>BED [Gy]</b> | <b>SFED [Gy]</b> | <b>EQD<sub>2</sub> [Gy]</b> |
| $\alpha/\beta =$ | 3  | 153.3           | 20.0             | 92.0                        |
| $\alpha/\beta =$ | 10 | 60.0            | 20.0             | 50.0                        |

**Table S3d: BED, SFED and EQD2 reported at hot spot = 40 Gy**

| <b>40 Gy</b>     |    |                 |                  |                             |
|------------------|----|-----------------|------------------|-----------------------------|
| Dose per frac =  | 40 | Total dose =    | 40               |                             |
|                  |    | <b>BED [Gy]</b> | <b>SFED [Gy]</b> | <b>EQD<sub>2</sub> [Gy]</b> |
| $\alpha/\beta =$ | 3  | 573.3           | 40.0             | 344.0                       |
| $\alpha/\beta =$ | 10 | 200.0           | 40.0             | 166.7                       |
